# Supplementary material for: A sensitive colorimetric label-free assay for trypsin and inhibitor screening with gold nanoparticles
Source: Royal Society of Chemistry journal article supplement (doi:10.1039/c1an15224f), 2011-01-01
Supplement: c1an15224f.pdf [file c1an15224f.pdf]

Supplementary Information for the following manuscript

## A sensitive colorimetric label-free assay for trypsin and inhibitor screening with gold nanoparticles

Wangxin Xue,<sup>a</sup> Guanxin Zhang<sup>a</sup> and Deqing Zhang<sup>\*a</sup>

<sup>a</sup>Organic Solids Laboratory, Beijing National Laboratory for Molecular Science, Institute of Chemistry, Chinese Academy of Sciences, Beijing 100190, P.R.China. E-mail: dqzhang@iccas.ac.cn

### 1. Absorption spectra of Au-NPs after addition of only trypsin

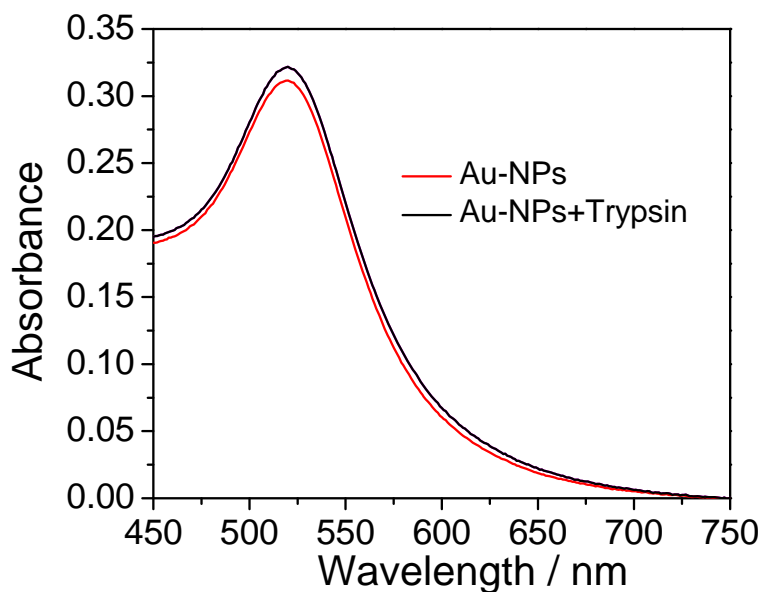

**Fig. S1** Absorption spectra of Au-NPs(1.04 nM in PBS (2.0 mM, pH = 8.5) without (red line) and with the addition of only trypsin (30 ng/mL) after incubation at room temperature for 10 min. (black line).

**2. Absorption spectra of Au-NPs containing Arg<sub>6</sub> and trypsin in solutions of different pH values.**

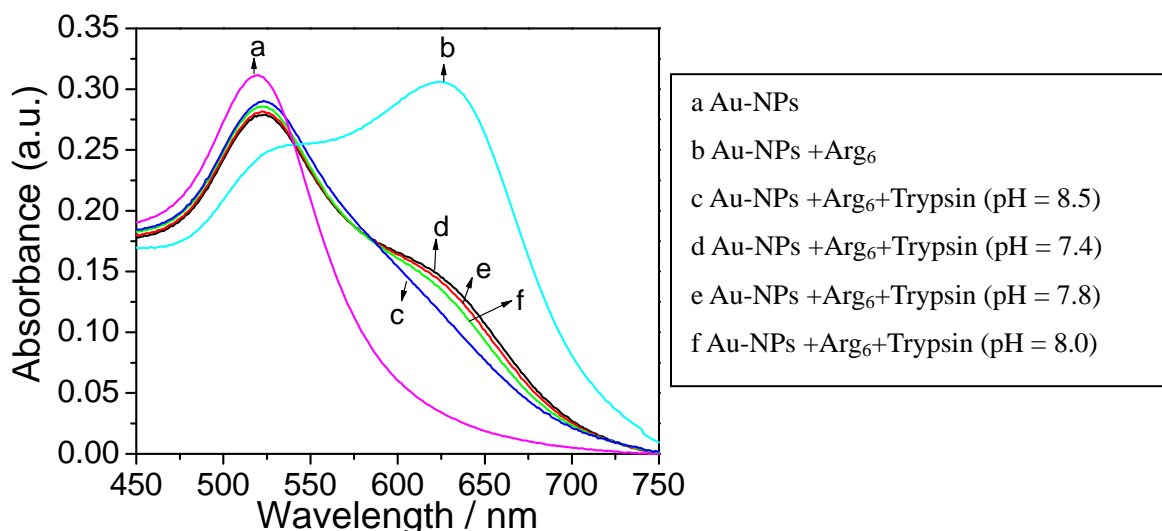

**Fig. S2** The absorption spectra of the Au-NP [1.04 nM in PBS (2.0 mM) buffer solution] containing Arg<sub>6</sub> peptide (3.0  $\mu$ M) and trypsin (15.0 ng/mL) in solutions of different pH values; each solution of Arg<sub>6</sub> and trypsin was incubated for 10.0 min. at room temperature before mixing with Au-NPs for spectral measurements. .

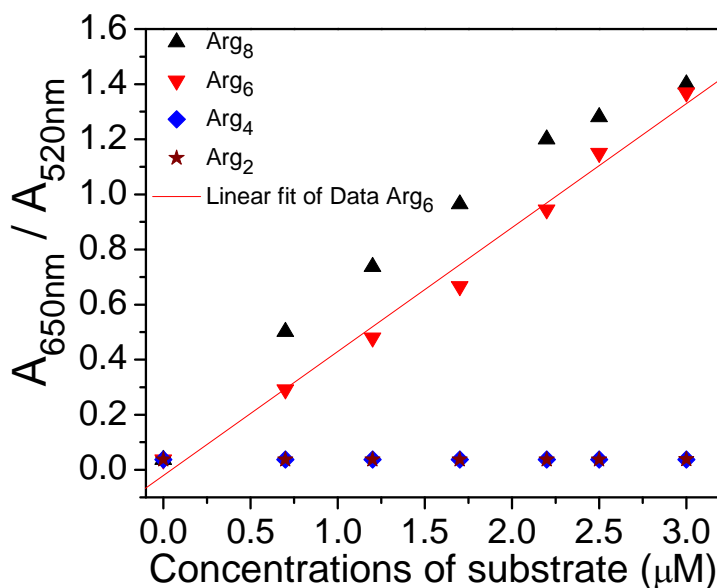

**Fig. S3** Variation of the absorbance ratio  $A_{650\text{nm}}/A_{520\text{nm}}$  vs. concentrations of arginine peptides (Arg<sub>8</sub>, Arg<sub>6</sub>, Arg<sub>4</sub> and Arg<sub>2</sub>) for the Au-NP(1.04 nM in PBS (2.0 mM, pH = 8.5) buffer solution) solutions in the presence of different amounts of arginine peptides from 0.0 to 3.0  $\mu$ M.

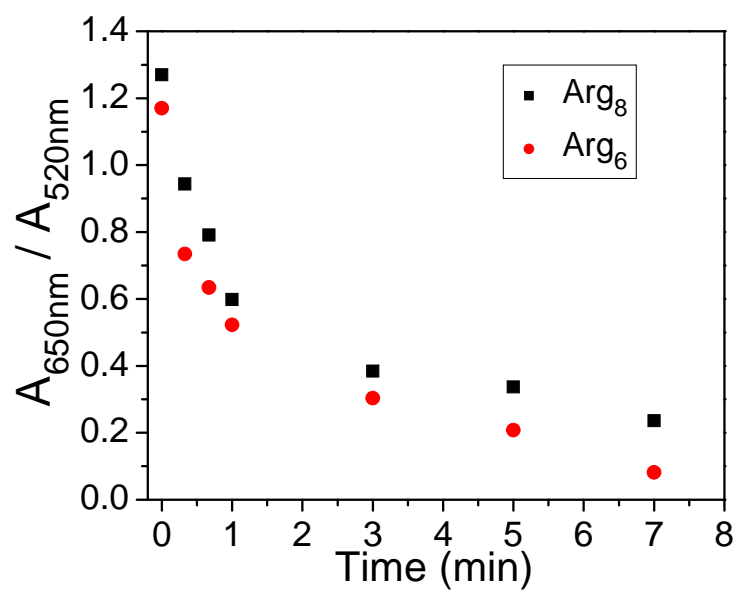

**Fig. S4** Variation of the absorbance ratio  $A_{650\text{nm}}/A_{520\text{nm}}$  vs. the reaction time for the Au-NPs [1.04 nM in PBS (2.0 mM, pH = 8.5) buffer solution] after mixing with the incubated solutions of trypsin (8.0 ng/mL), Arg<sub>8</sub>(3.0  $\mu\text{M}$ ) and Arg<sub>6</sub> peptide (3.0  $\mu\text{M}$ ) respectively.
